# Supplementary material for: Prognostic factors related with outcomes in traumatic out-of-hospital cardiac arrest patients without prehospital return of spontaneous circulation: a nationwide observational study
Source: PubMed Central journal article supplement — Clin Exp Emerg Med. 2020 Mar 31;7(1):14–20. doi: 10.15441/ceem.19.057 (PMC7141977; doi:10.15441/ceem.19.057), 2020-03-31
Supplement: ceem-19-057-suppl.pdf [file ceem-19-057-suppl.pdf]

**Supplementary Table 1.** Criteria for detailed classification of causes of traumatic cardiac arrest

| Category         | Definition                                                                                                                                                                                                                             |
|------------------|----------------------------------------------------------------------------------------------------------------------------------------------------------------------------------------------------------------------------------------|
| Traffic accident | Any damages related to means of transportation (automobile, motorbike, powerless transportation, trains, ships, airplanes, etc.)                                                                                                       |
| Fall             | Any damages from local energy including slipping and falling, falling down stairs, jumping, etc.                                                                                                                                       |
| Collision        | Hit by a fist, colliding with an object (bumping into a door), trapped between objects or people, trapped in a vehicle that is not in service, touching a machine, striking by explosives, collapsing of a building or structure, etc. |
| Stab injury      | A knife or broken glass cuts hands, bites on animals or people, or pricks with sharp substances, such as knives                                                                                                                        |
| Gunshot injury   | Damage caused by bullet or explosive substances fired from a gun                                                                                                                                                                       |

**Supplementary Table 2.** Criteria for detailed classification of cardiac arrest sites

| Category              | Definition                                                                                                                                                                                                                                                                                                                                                           |
|-----------------------|----------------------------------------------------------------------------------------------------------------------------------------------------------------------------------------------------------------------------------------------------------------------------------------------------------------------------------------------------------------------|
| Public place          |                                                                                                                                                                                                                                                                                                                                                                      |
| Road/highway          | A road, a motorway, a paved road, a highway, a crossing, a car, etc.                                                                                                                                                                                                                                                                                                 |
| Public building       | Schools, public playgrounds, public buildings, libraries, public welfare centers, etc.                                                                                                                                                                                                                                                                               |
| Leisure-related place | Amusement parks such as zoos, botanical gardens and plazas, parks, opera houses, cinemas, theaters, museums, galleries, and amusement parks in the Han River/Water lands, etc.                                                                                                                                                                                       |
| Industrial facilities | Gas plant, all buildings under construction (home under construction, etc.); tunnels under construction; industrial parks; factory buildings; factory premises (including premises roads and parking lots; warehouses); mines, dry dock, power stations, docks, oil wells and other off-shore facilities; workshops, shipyards, quarries, railway compartments, etc. |
| Commercial facilities | Office, sauna, bathhouse, shopping mall, supermarket, convenience store, market, bank, gas station, bar, cafe, hotel, restaurant, rest area, wedding hall, funeral parlor, etc.                                                                                                                                                                                      |
| Terminal              | Railway station, bus stop, airport, subway, dock, harbor, anchored line                                                                                                                                                                                                                                                                                              |
| Other public places   | Land bridge, overloaded vehicle checkpoints, trains, churches, cathedrals, temples, public parking lots, cruise ships, ferries, airplanes, welfare centers, community centers, senior citizens' homes, river centers, kindergartens, daycare centers, etc.                                                                                                           |
| Non-public place      |                                                                                                                                                                                                                                                                                                                                                                      |
| House                 | Inside the house, private housing yard, private housing garden, entry road to private housing (road in apartment complex), private housing garage (park in apartment complex), swimming pool in private house or garden, security office (in apartment complex), playground (in apartment complex)                                                                   |
| Collective residence  | Dormitories, test centers, military, orphanages, prisons, sports facilities belonging to collective residential facilities, etc.                                                                                                                                                                                                                                     |
| Nursing home          | Nursing facilities, elderly care facilities, welfare centers, dementia centers, etc.                                                                                                                                                                                                                                                                                 |
| Medical institution   | General hospitals, hospitals, dental clinics, oriental hospitals, nursing hospitals, clinics, dental clinics, oriental clinics, and nursing homes                                                                                                                                                                                                                    |
| Farm                  | Arable land (paddy fields, paddy banks, fields), farm buildings, farm water, farmlands, orchards, breeding grounds, etc.                                                                                                                                                                                                                                             |
| Ambulance             | Inside an ambulance                                                                                                                                                                                                                                                                                                                                                  |
| Other places          | Mountains, rivers, seas, beaches, breakwater, valleys, lakes, bridges, railways, railroads, a walkway, a mineral spring, a vacant lot                                                                                                                                                                                                                                |
